# Supplementary material for: Diagnostik und Behandlung von Tauchunfällen
Source: Springer Nature journal article supplement (doi:10.1007/s00101-015-0033-7), 2015-05-29
Supplement: MOESM2 [file 8005836]

# **Leitlinienreport zu der methodischen Vorgehensweise bei der Entwicklung der Leitlinie Tauchunfall der GTÜM e.V. (AWMF-Register-Nr.: 072-001) in Zusammenarbeit mit der SUHMS in der Schweiz**

## **1 Geltungsbereich und Zweck**

### **1.1 Begründung für die Auswahl des Leitlinienthemas**

Die Leitlinie Tauchunfall soll eine Hilfe für medizinische Entscheidungsprozesse im Rahmen einer leistungsfähigen Versorgung der Patienten darstellen. Sie gibt dem einzelnen Arzt, medizinischen Assistenzpersonal und Laien in einem spezifischen Notfallbereich Informationen und Instruktionen über den aktuellen Stand der medizinischen Erkenntnisse. Im Rahmen der Qualitätssicherung stellt sie eine qualitativ hochstehende medizinische Versorgung dar.

### **1.2 Zielorientierung der Leitlinie**

Die Leitlinie legt den aktuellen Stand der Erkenntnisse in der Diagnostik und Behandlung von Tauchunfällen dar.

- in der Ersten Hilfe durch Laien, medizinisches Assistenzpersonal und Ärzte
- in den Prinzipien der Rettungskette und des Transports verunfallter Taucher
- in der ersten hyperbarmedizinischen Therapie von Tauchunfällen
- in der weiteren medizinischen Versorgung von Tauchunfällen

### **1.3 Patientenzielgruppe**

Alle Personen ohne Beschränkungen hinsichtlich Geschlecht, Alter, Krankheitsstadium oder Begleiterkrankungen, die einen Tauchunfall gemäß Definition der Leitlinie erlitten haben.

Ein „Tauchunfall“ im Sinne dieser Leitlinie ist ein potentiell lebensbedrohliches oder gesundheitsschädigendes Ereignis, hervorgerufen durch Abfall des Umgebungsdruckes beim Tauchen oder aus sonstiger hyperbarer Atmosphäre mit und ohne Tauchgerät in der Dekompressionsphase.

### **1.4 Versorgungsbereich**

Die Leitlinie umfasst sowohl den ambulanten Versorgungsbereich als auch den klinisch stationären Versorgungssektor. Die Leitlinie weist auf die Früherkennung von Tauchunfällen hin, beschreibt die notwendige Diagnostik und im Sinne des Leitlinienthemas die notwendige Therapie. Entsprechend 1.2 erfolgt eine präzise Beschreibung für primäre Maßnahme durch medizinische Laien sowie medizinisches Fachpersonal.

## 1.5 Anwenderzielgruppe/Adressaten

Betroffen und indirekte Anwender dieser Leitlinie sind alle Taucher. Gleichzeitig werden den Tauchern und insbesondere verantwortlichen Tauchlehrern konkrete Entscheidungs- und Handlungsprozesse für eine fachgerechte primäre Versorgung von Tauchunfällen vorgegeben. Neben medizinischen Laienhelfern ist im Rahmen der Notfallversorgung das medizinische Fachpersonal der Rettungsdienste einschließlich der erstbehandelnden Ärzte Anwender dieser Leitlinie.

Zusätzlich sollen sowohl den primärversorgenden Ärzten in den Notaufnahmen der Krankenhäuser als auch den weiterbehandelnden Ärzten an therapeutischen Druckkammern die Entscheidungs- und Handlungsprozesse der Leitlinie Tauchunfall anwenden.

Indirekte Anwender einer leitliniengemäßen Behandlung von Tauchunfällen im weiteren Sinne sind ebenso Kostenträger der Krankenversorgung und Entscheidungsträger im gesundheitspolitischen Bereich.

## 2 Zusammensetzung der Leitliniengruppe: Beteiligung von Interessensgruppen

### 2.1 Repräsentativität der Leitliniengruppe: Beteiligte Berufsgruppen

Die Leitliniengruppe wurde in Bezug auf die Anwendergruppen repräsentativ zusammengesetzt. Die von den Fachgesellschaften und Organisationen beauftragten Mandatsträger sind nachfolgend aufgeführt. Zudem wurden drei weitere tauch- und hyperbarmedizinische Experten hinzugezogen.

#### Stimmberechtigte Autoren dieser Leitlinie / Leitliniengruppe

- Priv.-Doz. Dr. Björn Jüttner (Leitlinienkoordinator), Gesellschaft für Tauch- und Überdruckmedizin e.V. (GTUM), Medizinische Hochschule Hannover, Carl-Neuberg-Str. 1, D-30625 Hannover
- Dr. Christian Wölfel, Schweizerischen Gesellschaft für Unterwasser- und Hyperbarmedizin (SUHMS), SRO Spital Langenthal, Anästhesie/Schmerztherapie, St. Urbanstrasse 67, CH 4901 Langenthal
- Dr. Hendrik Liedtke, Deutsche Interdisziplinäre Vereinigung für Intensiv- und Notfallmedizin (DIVI) Sektion Hyperbarmedizin, Krankenhaus St. Elisabeth und St. Barbara, Klinik für Anästhesie, Intensivmedizin, Notfallmedizin und Schmerztherapie, Mauerstraße 5, D-06110 Halle (Saale)
- Dr. Konrad Meyne, Verband Deutscher Sporttaucher e.V. (VDST), Fleischscharren 4, D-38640 Goslar
- Dr. Henning Werr, Schiffahrtmedizinisches Institut der Marine, Kopperpähler Allee 120, D-24119 Kronshagen
- Dr. Thomas Bräuer, Berufsgenossenschaft der Bauwirtschaft (BG Bau), ASD der BG BAU, Zentrum Neumünster, Wasbeker Straße 351 A, D-24537 Neumünster

- Michael Kemmerer, Verband Deutscher Druckkammerzentren e.V. (VDD), Druckkammerzentren RMT GmbH, Schiersteiner Str. 42, D-65187 Wiesbaden
- Dr. Giso Schmeißer, Deutsche Gesellschaft für Arbeitsmedizin und Umweltmedizin e.V. (DGAUM), Institut für Arbeit und Gesundheit der DGUV, Königsbrücker Landstraße 2, D-01109 Dresden
- Priv.-Doz. Dr. Tim Piepho, Universitätsmedizin der Johannes Gutenberg-Universität Mainz, Klinik für Anästhesiologie, Langenbeckstr. 1, D-55131 Mainz
- Dr. Oliver Müller, Vivantes-Klinikum Friedrichshain, Zentrum für hyperbare Sauerstofftherapie und Tauchmedizin, Matthiasstrasse 7, D-10249 Berlin
- Dr. Holger Schöppenthau, Berufsgenossenschaftliche Unfallklinik Murnau, Abteilung für Anästhesie und anästhesiologische Intensivmedizin, Druckkammerzentrum - HBO, Prof.-Küntscher-Str. 8, D-82418 Murnau am Staffelsee

### **Methodische Begleitung**

- Dr. Cathleen Muche-Borowski, Arbeitsgemeinschaft der Wissenschaftlichen Medizinischen Fachgesellschaften e.V. (AWMF), Philipps-Universität, Karl-von-Frisch-Str. 1, D-35043 Marburg

Für die Zusammensetzung der Entwicklungsgruppe wurde sowohl die tauchmedizinische Expertise als auch die Repräsentation der Anwendergruppen Taucher (Sporttaucher, gewerbliche Taucher, Druckluftarbeiter), Tauchlehrer (Erste-Hilfe durch Laien), medizinisches Assistenzpersonal (Rettungsdienst, präklinische Notfallmedizin) und Ärzte (präklinische/klinische Primärversorgung und Weiterbehandlung in Druckkammern) berücksichtigt.

### **2.2 Repräsentativität der Leitliniengruppe: Beteiligung von Patienten**

Patienten im Sinne der Leitlinie Tauchunfall sind Taucher und Druckluftarbeiter. Alle beteiligten Experten der Leitliniengruppe waren entweder erfahrene Sporttaucher, Taucher in Hilfeleistungsunternehmen, Technische Taucher oder Tauchlehrer und somit potentiell selbst betroffen.

Dr. Konrad Meyne (Tauchlehrer im Verband deutscher Sporttaucher) übernahm insbesondere die Patientenvertretung für Sporttaucher. Dr. Thomas Bräuer und Dr. Giso Schmeißer vertraten die gewerblichen Taucher.

### 3. Methodologische Exaktheit

#### Recherche, Auswahl und Bewertung wissenschaftlicher Belege (Evidenzbasierung)

##### 3.1 Formulierung von Schlüsselfragen

Für die Überarbeitung der Leitlinie wurden von der Leitliniengruppe Schlüsselfragen formuliert. Diese Schlüsselfragen orientierten sich an dem Versorgungsablauf und wurden dementsprechend thematisch in Gruppen zusammengefasst.

##### Schlüsselfragen Gruppe 1 – Epidemiologie, Definition, Verlauf, Prognose

| Nr. | Schlüsselfragen                                                                                                                                | Bearbeiter                 |
|-----|------------------------------------------------------------------------------------------------------------------------------------------------|----------------------------|
| 1.1 | Wie hoch ist die Prävalenz von Tauchunfällen/Dekompressionserkrankungen in Deutschland?                                                        | Werr, Bräuer, <u>Meyne</u> |
| 1.2 | Definition der symptomatischen Dekompressionserkrankung?                                                                                       | Werr, Bräuer, Meyne        |
| 1.3 | Definition von weiteren druckassoziierten Erkrankungen sowie Abgrenzung der Begrifflichkeiten?                                                 | Werr, Bräuer, Meyne        |
| 1.4 | Welche externen und physiologischen Risikofaktoren beeinflussen das Auftreten und die Prognose einer symptomatischen Dekompressionserkrankung? | Werr, Bräuer, Meyne        |

##### Schlüsselfragen Gruppe 2 – Symptome, Diagnostik

| Nr. | Schlüsselfragen                                                                                                                 | Bearbeiter      |
|-----|---------------------------------------------------------------------------------------------------------------------------------|-----------------|
| 2.1 | Welche Untersuchungsverfahren sind valide zur Diagnose und zur Verlaufsbeobachtung einer Dekompressionserkrankung?              | Piepho, Jüttner |
| 2.2 | Erkennen von weiteren tauchbedingten Gesundheitsstörungen (Barotrauma NNH, ...)?                                                | Piepho, Jüttner |
| 2.3 | Welche Einteilungen sind zur Beurteilung des Schweregrades einer Dekompressionserkrankung notwendig, geeignet und zu empfehlen? | Piepho, Jüttner |
| 2.4 | Welche Diagnostik (und wann) ist notwendig vor geplanter Druckkammerbehandlung?                                                 | Piepho, Jüttner |

## Schlüsselfragen Gruppe 3 – Therapieverfahren, Therapieorganisation

| Nr.  | Schlüsselfragen                                                                                                                          | Bearbeiter                                    |
|------|------------------------------------------------------------------------------------------------------------------------------------------|-----------------------------------------------|
| 3.1  | Welche Maßnahmen werden für Laienhelfer empfohlen? (ERC-Leitlinien, ...)                                                                 | Müller,<br>Schöppenthau,<br>Liedtke, Kemmerer |
| 3.2  | Welche Maßnahmen werden für medizinisches Fachpersonal empfohlen?                                                                        | Müller,<br>Schöppenthau,<br>Liedtke, Kemmerer |
| 3.3  | Wer soll die Indikation auf der Basis welcher klinischen und apparativen Befunde zu den einzelnen Therapieverfahren stellen?             | Müller,<br>Schöppenthau,<br>Liedtke, Kemmerer |
| 3.4  | Wann und zu welchem Zeitpunkt besteht die Indikation zur Sauerstoffatmung oder/und Druckkammerbehandlung einer Dekompressionserkrankung? | Müller,<br>Schöppenthau,<br>Liedtke, Kemmerer |
| 3.5  | Gibt es alternative und/oder ergänzende Therapieverfahren gegenüber der Druckkammerbehandlung?                                           | Müller,<br>Schöppenthau,<br>Liedtke, Kemmerer |
| 3.6  | Was umfasst ein optimales Tauchunfallmanagement bis zur Druckkammerbehandlung?                                                           | Müller,<br>Schöppenthau,<br>Liedtke, Kemmerer |
| 3.7  | Welche Behandlungsschemata?                                                                                                              | Müller,<br>Schöppenthau,<br>Liedtke, Kemmerer |
| 3.8  | Ist das Therapieverfahren von den verwendeten Atemgasen abhängig?                                                                        | Müller,<br>Schöppenthau,<br>Liedtke, Kemmerer |
| 3.9  | Nach welcher Zeit / (Warteintervall?) kann ein Patient nach Tauchunfall und Druckkammerbehandlung in einem Linienflugzeug fliegen?       | Müller,<br>Schöppenthau,<br>Liedtke, Kemmerer |
| 3.10 | Welche Ausstattung der Druckkammer ist für eine Druckkammerbehandlung notwendig?                                                         | Müller,<br>Schöppenthau,<br>Liedtke, Kemmerer |
| 3.11 | Welche personelle Qualifikation ist erforderlich für eine Druckkammerbehandlung?                                                         | Müller,<br>Schöppenthau,<br>Liedtke, Kemmerer |
| 3.12 | Wie häufig sind die primären Druckkammerbehandlungsverfahren anzuwenden?                                                                 | Müller,<br>Schöppenthau,<br>Liedtke, Kemmerer |

## Schlüsselfragen Gruppe 4 – Rehabilitation, Nachsorge, Lebensqualität

| Nr. | Schlüsselfragen                                                                                                                                       | Bearbeiter                   |
|-----|-------------------------------------------------------------------------------------------------------------------------------------------------------|------------------------------|
| 4.1 | Wie wird ein primäres Therapieversagen klinisch und pathophysiologisch definiert und wie muss dann diagnostisch und therapeutisch vorgegangen werden? | Wölfel, Schöppenthau, Piepho |
| 4.2 | Profitieren Patienten von einer fortgesetzten Druckkammerbehandlung und/oder von einer Rehabilitation/AHB?                                            | Wölfel, Schöppenthau, Piepho |
| 4.3 | Gibt es eine Einschränkung der Tauchtauglichkeit nach einem diagnostizierten Tauchunfall und von wem wird diese wann beurteilt?                       | Wölfel, Piepho               |
| 4.4 | Welche Diagnostik ist notwendig für die erneute Beurteilung der Tauchtauglichkeit?                                                                    | Wölfel, Piepho               |

## Schlüsselfragen Gruppe 5 – Gesundheitsökonomie, Qualitätsindikatoren

| Nr. | Schlüsselfragen                                                                                            | Bearbeiter     |
|-----|------------------------------------------------------------------------------------------------------------|----------------|
| 5.1 | Wie ist die Effektivität von Tauchtauglichkeitsuntersuchungen zu bewerten? (Empfehlung Tauchtauglichkeit)  | Meyne, Jüttner |
| 5.2 | Welche Maßnahmen oder Parameter kennzeichnen eine gute Tauchunfallversorgung?                              | Meyne, Jüttner |
| 5.3 | Wie kann die Tauchunfallversorgung dokumentiert und erfasst werden?                                        | Meyne, Jüttner |
| 5.4 | Können nachvollziehbare und messbare Qualitätsindikatoren für eine Tauchunfallversorgung definiert werden? | Meyne, Jüttner |

### 3.2 Verwendung existierender Leitlinien zum Thema

Für die Überarbeitung dieser vorliegenden Leitlinie wurden die bisher veröffentlichten Leitlinien Tauchunfall der vorausgehenden Entwicklungsstufen zugrunde gelegt.

Auf die existierenden Leitlinien zur Wiederbelebung von ERC/AHA wurde gegebenenfalls verwiesen.

Die Recherche nach nationalen oder internationalen Leitlinien wurde am 30.04.2014 in der International Guidelines Library [1] innerhalb des Publikationstypen „Guideline“ mittels der Suchbegriffe „diving“ (1 Treffer) und „decompression sickness“ or „decompression illness“ (0 Treffer) vorgenommen.

1 <http://www.g-i-n.net/library/international-guidelines-library>

Weiterhin wurde ebenfalls am 30.04.2014 eine Pubmed-Suche mit folgendem Suchstring vorgenommen (8 Treffer):

```
("Guideline"[Publication Type] OR "Practice  
Guideline"[Publication Type])
```

AND

```
((("diving"[MeSH Terms] AND "accidents"[MeSH Terms]) OR  
("diving"[All Fields] AND "accident"[All Fields])) OR "diving  
accident"[All Fields]
```

OR

```
"decompression sickness"[MeSH Terms] OR ("decompression"[All  
Fields] AND "sickness"[All Fields]) OR "decompression  
sickness"[All Fields]
```

OR

```
("decompression"[All Fields] AND "illness"[All Fields]) OR  
"decompression illness"[All Fields])
```

Weitere Treffer wurden mittels Handsuche bei bekannten Leitlinien-Institutionen (u.a. NICE, SIGN, CCO) ermittelt.

### 3.3 Systematische Literaturrecherche

Der Leitliniengruppe stand für die computergestützte Recherche die Literatur-Datenbank der GTÜM e.V. zur Verfügung (Access-Datenbank mit Suchprogramm incl. Volltextsuche, monatliches Update durch Bibliothekarin der GTÜM e.V., erhältlich über <http://www.gtuem.org>, letzter Stand: März 2014). Folgende Datenquellen wurden hier unter anderem berücksichtigt.

Datenbanken:

- Medical Literature Analysis and Retrieval System Online (MEDLINE)
- Cochrane Library
- Databank of Undersea and Hyperbaric Medical Society (UHMS), U.S.A.

Kongressberichte:

- European Underwater and Baromedical Society (EUBS)
- Undersea and Hyperbaric Medical Society (UHMS)
- South Pacific Underwater Medicine Society (SPUMS)
- International Congress on Hyperbaric Medicine (ICHM)
- European Committee for Hyperbaric Medicine, European Consensus Conferences

Zudem wurde die Datenbank „Rubicon Research Repository“, verfügbar über <http://www.rubicon-foundation.org>, letzter Stand: März 2014, abgefragt.

Die Literaturrecherche in der Datenbank MEDLINE wurde über <http://www.pubmed.org> mit folgenden Suchstrings durchgeführt.

## **Schlüsselfragen Gruppe 1 – Epidemiologie, Definition, Verlauf, Prognose**

### **Suchworte, User Query – Medline (Pubmed)**

((("diving"[MeSH Terms] AND "accidents"[MeSH Terms])) OR ("diving"[All Fields] AND "accident"[All Fields])) OR "diving accident"[All Fields]

OR

"decompression sickness"[MeSH Terms] OR ("decompression"[All Fields] AND "sickness"[All Fields]) OR "decompression sickness"[All Fields]

OR

("decompression"[All Fields] AND "illness"[All Fields]) OR "decompression illness"[All Fields])

AND

("prevalence"[All Fields] OR "frequency"[All Fields] OR "incidence"[All Fields])

AND

("2011"[PDAT] : "2014"[PDAT])

## **Schlüsselfragen Gruppe 2 – Symptome, Diagnostik**

### **Suchworte, User Query – Medline (Pubmed)**

((("diving"[MeSH Terms] AND "accidents"[MeSH Terms])) OR ("diving"[All Fields] AND "accident"[All Fields])) OR "diving accident"[All Fields]

OR

"decompression sickness"[MeSH Terms] OR ("decompression"[All Fields] AND "sickness"[All Fields]) OR "decompression sickness"[All Fields]

OR

("decompression"[All Fields] AND "illness"[All Fields]) OR "decompression illness"[All Fields])

AND

("classification"[All Fields] OR "diagnosis"[All Fields] OR "symptoms"[All Fields])

AND

("2011"[PDAT] : "2014"[PDAT])

## **Schlüsselfragen Gruppe 3 – Therapieverfahren, Therapieorganisation**

### **Suchworte, User Query – Medline (Pubmed)**

((("diving"[MeSH Terms] AND "accidents"[MeSH Terms])) OR ("diving"[All Fields] AND "accident"[All Fields])) OR "diving accident"[All Fields]

OR



"decompression sickness"[MeSH Terms] OR ("decompression"[All Fields] AND "sickness"[All Fields]) OR "decompression sickness"[All Fields]

OR

("decompression"[All Fields] AND "illness"[All Fields]) OR "decompression illness"[All Fields])

AND

("diagnosis"[All Fields] OR "therapy"[All Fields] OR "treatment"[All Fields] OR "hyperbaric oxygen therapy"[All Fields] OR "hyperbaric oxygenation"[All Fields] OR "flying"[All Fields])

AND

("2011"[PDAT] : "2014"[PDAT])

#### **Schlüsselfragen Gruppe 4 – Rehabilitation, Nachsorge, Lebensqualität**

##### **Suchworte, User Query – Medline (Pubmed)**

((("diving"[MeSH Terms] AND "accidents"[MeSH Terms]) OR ("diving"[All Fields] AND "accident"[All Fields]) OR "diving accident"[All Fields])

OR

"decompression sickness"[MeSH Terms] OR ("decompression"[All Fields] AND "sickness"[All Fields]) OR "decompression sickness"[All Fields]

OR

("decompression"[All Fields] AND "illness"[All Fields]) OR "decompression illness"[All Fields])

AND

("rehabilitation"[All Fields] OR "fitness"[All Fields])

AND

("2011"[PDAT] : "2014"[PDAT])

#### **Schlüsselfragen Gruppe 5 – Gesundheitsökonomie, Qualitätsindikatoren**

##### **Suchworte, User Query – Medline (Pubmed)**

("diving"[MeSH Terms] OR "diving"[All Fields] OR "diver"[All Fields])

AND

("fitness test"[All Fields] OR "diving fitness"[All Fields] OR "examination"[All Fields] OR "quality"[All Fields])

Die Sichtung und Eingrenzung der relevanten Literatur für die Erarbeitung der Schlüsselfragen erfolgte durch die den Gruppen zugeordneten Mitgliedern der

Leitliniengruppe. Zusätzlich erfolgte eine Handsuche nach relevanter Literatur, es wurden hierfür keine Einschränkungen oder Reglementierungen festgelegt.

### **3.4 Auswahl der Evidenz**

Es wurden wo möglich Studien der Evidenzklasse 1 herangezogen. In den überwiegenden Bereichen waren jedoch Studien der Evidenzklasse 1 nicht vorhanden. Vergleichbar mit anderen Bereichen der Medizin, stehen hier trotz weltweiter Akzeptanz der Therapiemaßnahmen keine entsprechenden randomisierten Studien zur Verfügung. Insgesamt ist die Anzahl aussagekräftiger Studien gering, so dass das Management des Tauchunfalls in vielen Bereichen empirisch bleibt und sich häufig aus pathophysiologischen Überlegungen ableitet.

### **3.5 Bewertung der Evidenz**

Im Rahmen der Leitlinienentwicklung der Stufe 2k erfolgte keine Bewertung der Evidenz.

### **3.6 Erstellung von Evidenztabellen**

Im Rahmen der Leitlinienentwicklung der Stufe 2k erfolgte keine Erstellung von Evidenztabellen.

## **Formulierung der Empfehlungen und strukturierte Konsensfindung**

### **3.7 Formale Konsensfindung: Verfahren und Durchführung**

Die vorliegende Leitlinie basiert auf der 2002 erstmals erstellten und 2005 überarbeiteten S1 „Leitlinie Tauchunfall“.

Diese S1 Leitlinie wurde vom 19.-20.04.2008 auf einer Konsensuskonferenz nach dem „National Institutes of Health“ -Vorbild im Rahmen der wissenschaftlichen Tagung der GTÜM e.V. beraten und das Ergebnis am Konferenzende als S2 „Leitlinie Tauchunfall“ festgeschrieben.

Nach einer Konsensuskonferenz vom 18.-20.03.2011 wurde die zuletzt konsentiertere S2k „Leitlinie Tauchunfall“ (AWMF-Nr. 072-001) für den Gültigkeitszeitraum 2011 - Oktober 2014 festgeschrieben.

Für die Überarbeitung der vorliegenden S2k Leitlinie beauftragte die GTÜM e.V. als federführende Fachgesellschaft am 28.11.2012 einen Leitlinienkoordinator. Die Koordination und Projektplanung wurde mit der methodischen Begleitung und Beratung der AWMF durchgeführt.

Entsprechend des erstellten Projektablaufplanes ist bis zum 31.03.2013 eine Leitliniengruppe konstituiert worden. Die Fachgesellschaften, Organisationen, relevanten Berufsgruppen und Experten für die Zusammenstellung der Leitliniengruppe wurden für eine Mitarbeit angefragt.

In dem ersten Konsensusprozess wurden in einem Treffen der Leitliniengruppe am 13.11.2013 folgende Punkte des Projektablaufplanes bearbeitet.

- Überprüfung und Feststellung der Vollständigkeit der Leitliniengruppe
- Vorstellung und Festlegung des Methodischen Konzepts (DELBI, Projektplan)
- Darlegung von Interessenkonflikten und Diskussion über Umgang mit bestehenden Konflikten
- Überarbeitung und Konsentierung der Schlüsselfragen
- Konstituierung von themenbezogenen Arbeitsgruppen

Nachfolgend wurden durch die Arbeitsgruppen nachstehende Aufgaben erarbeitet.

- Recherche nach existierenden Leitlinien:
- Suche in bibliographischen Datenbanken (MEDLINE, EMBASE) und / oder Leitlinien-Datenbanken (AWMF, ÄZQ, GIN)
- Suchstrategie detailliert beschreiben
- Festlegung der Ein- und Ausschlusskriterien (Themenbezug, Aktualität, Publikationssprache, Evidenz-/Konsensbasierung, Übertragbarkeit auf Deutschland, Erfolgsberichte zu Implementierung/Evaluierung)
- Bewertung der methodischen Qualität (DELBI)
- Tabellarische Gegenüberstellung der als Ergebnis der ersten Konsensusfindung verabschiedeten klinischen Fragen mit den Inhalten der ausgewählten Leitlinien und der gefundenen Literatur
- Prüfung, ob einzelne Empfehlungen daraus übernommen bzw. adaptiert werden können
- Erarbeitung von Schlüsselempfehlungen und Textentwürfen für die auf der Basis der Leitliniensynopse hinlänglich beantwortbaren klinischen Fragen
- Festlegung der Suchstrategie und Suche für die ausgewählten Fragen
- Plausibilitäts- und Vollständigkeitsprüfung
- Arbeiten aus dem eigenen Repertoire an den Koordinator (auch unpublizierte Originalia, Kongressbeiträge)
- Ausschluss irrelevanter Abstracts
- Diskussion und Ausarbeitung des Fließtextes der Leitlinie und von Algorithmen

Am 07.05.2014 wurde eine Konsensuskonferenz der Leitliniengruppe zu nachfolgenden Themen durchgeführt.

- Konsentierung der Schlüsselempfehlungen mit dem Nominalen Gruppenprozess, mit externer Moderation, angelehnt an folgendes Vorgehen:
  - Präsentation der zu konsentierenden Aussagen / Empfehlungen
  - Registrierung der Stellungnahmen im Umlaufverfahren und Zusammenfassung von Kommentaren durch den Moderator
  - Vorabstimmung über Diskussion der einzelnen Kommentare – Erstellung einer Rangfolge

- Debattieren / Diskussion der Diskussionspunkte
- Endgültige Abstimmung über jede Empfehlung und alle Alternativen
- Schritte wurden für jede Empfehlung wiederholt
- Erstellung und Fixierung eines klinischen Algorithmus
- Abschließende Konsentierung der Empfehlungen
- Alle Empfehlungen wurden einstimmig abgestimmt

Die Ergebnisse wurden im Weiteren durch den Leitlinienkoordinator zusammengefasst und redaktionell bearbeitet. Es sind die Abbildung der Algorithmen und der Leitlinienreport entworfen worden.

Zudem wurde die überarbeitete „Leitlinie Tauchunfall“ während der nachstehenden Fachkongresse diskutiert.

- 40th Annual Scientific Meeting of the European Underwater and Baromedical Society (EUBS), 24.-27.09.2014, Wiesbaden
- 10. Symposium für Tauchmedizin in Hannover, 18.10.2014

Nach der formalen Verabschiedung durch die beteiligten Fachgesellschaften / Organisationen, der externen Begutachtung (siehe 4.) wurde die Leitlinie im Umlaufverfahren per Email durch die Mitglieder der Leitliniengruppe endgültig einstimmig abgestimmt.

### **3.8 Berücksichtigung von Nutzen, Nebenwirkungen-relevanten Outcomes**

Die Erkenntnisse zur Behandlung von Dekompressionsunfällen mit einer hyperbaren Sauerstofftherapie (Druckkammerbehandlung) gehen auf historisch, empirische Erfahrungen zurück. Die Rekompensation stellt bis heute die einzige kausale Behandlungsmöglichkeit für Dekompressionsunfälle dar. Bis heute wurden die Behandlungsstrategien durch Grundlagenforschungen, Tierversuche und die Wirksamkeit in Beobachtungsstudien zahlreicher behandelter Tauchunfälle hinreichend belegt und weiter entwickelt. Die Rekompensationstherapie ist heute weltweit als medizinischer „Goldstandard“ zur Therapie von Dekompressionskrankheit und arterieller Gasembolie anerkannt.

Aufgrund der bekannten Pathophysiologie werden bei einem schweren Tauchunfall mit neurologischen Ausfällen die bestmöglichen Erfolgsaussichten durch einem Beginn der hyperbaren Sauerstofftherapie innerhalb von maximal 2 Stunden erreicht.

Randomisierte, kontrollierte prospektive Studien mit einer aussagekräftigen Fallzahl eingeschlossener Patienten liegen nur vereinzelt vor.

Die Rekompensation mit Sauerstoffatmung ist nicht ohne mögliche Nebenwirkungen. Aufgrund der hohen Sauerstoffpartialdrücke besteht das prinzipielle Risiko eine Sauerstoffintoxikation. Dieses Risiko existiert vor allem für das zentrale Nervensystem und die Lunge. Bei fachgerechter Durchführung der heute etablierten, leitliniengemäßen Therapieschemata ist das Auftreten der genannten Nebenwirkungen gering. Das Risiko des sauerstoffinduzierten Krampfanfalls wird mit ungefähr 1:10.000 angegeben.

In jedem Fall überwiegen die Vorteile der hyperbaren Sauerstoffatmung die prinzipiell möglichen Risiken.

### **3.9 Formulierung der Empfehlungen und Vergabe von Evidenzgraden und/oder Empfehlungsgraden**

entfällt (S2k-Leitlinie)

## **4. Externe Begutachtung und Verabschiedung**

### **4.1 Pilottestung**

Die Empfehlungen, Schlüsselempfehlungen und Therapieschemata der vorliegenden Leitlinie bestehen prinzipiell seit Jahrzehnten und in Form einer Leitlinienempfehlung für Deutschland seit 2002. Es besteht ein anerkanntes überragendes Nutzen/Risiko Verhältnis entsprechend 3.8.

### **4.2 Externe Begutachtung**

Vor der Veröffentlichung der Leitlinie erfolgte ein Begutachtungsverfahren entsprechend der DELBI Domäne 3 (Methodologische Exaktheit der Leitlinien-Entwicklung) Kriterium 13, um Unklarheiten oder fehlende Bereiche zu identifizieren.

Die überarbeitete „Leitlinie Tauchunfall“ wurde durch ein Peer-Review Verfahren in der indexierten Fachzeitschrift „Der Anästhesist“ extern begutachtet; eingereicht am 14.10.2014, Annahme der revidierten Version am 08.04.2015.

### **4.3 Verabschiedung durch die Vorstände der herausgebenden Fachgesellschaften/Organisationen**

Die durch die Leitliniengruppe konsentierete Leitlinie wurde dem Vorstand der GTÜM sowie den beteiligten Fachgesellschaften und Organisationen am 08.09.2014 zur Begutachtung und Autorisierung eingereicht.

Die „Leitlinie Tauchunfall“ wurde von dem Vorstand der GTÜM am 02.10.2014 autorisiert (8 Zustimmungen / 1 Gegenstimme). Die weiteren beteiligten Fachgesellschaften und Organisationen autorisierten die Leitlinie ohne inhaltliche Änderungswünsche.

## **5. Redaktionelle Unabhängigkeit**

### **5.1 Finanzierung der Leitlinie**

Die Konsensustreffen und die methodische Begleitung durch die AWMF im Rahmen der Leitlinienerstellung wurden von der GTÜM finanziert. Reisekosten sind von den Mitgliedern der Leitliniengruppe getragen worden. Es erfolgte keine Unterstützung durch Dritte.

## **5.2 Darlegung von und Umgang mit potenziellen Interessenkonflikten**

Die Darlegung von möglichen Interessenkonflikten erfolgte für die Mitglieder der Leitliniengruppe mit dem von der AWMF vorgeschlagenen Formblatt.

Die von den Autoren der Leitlinie angegebenen Interessenkonflikte wurden von dem Leitlinienkoordinator bewertet. Die dargelegten Interessenkonflikte des Leitlinienkoordinators wurden von der methodisch begleitenden Mitarbeiterin der AWMF beurteilt.

Die Mitglieder der Leitliniengruppe die einen Interessenkonflikt durch Besitz von Geschäftsanteilen an einem Druckkammerzentrum dargelegt hatten, enthielten sich bei der Abstimmung der Schlüsselfragen zur Indikation und Häufigkeit einer Druckkammerbehandlung.

## **6. Verbreitung und Implementierung**

### **6.1 Konzept zur Verbreitung und Implementierung**

Die überarbeitete S2k „Leitlinie Tauchunfall“ wurde durch ein Peer-Review Verfahren in der indexierten Fachzeitschrift „Der Anästhesist“ extern begutachtet und online publiziert.

In den Fortbildungs-Kursen und ärztlichen Weiterbildungs-Kursen der tauchmedizinischen Fachgesellschaften (GTÜM, ÖGTH, SUHMS) ist der Vermittlung der Leitlinienempfehlungen essentieller Bestandteil.

Die Information der betroffenen Taucher und medizinischen Laien erfolgt über die Implementierung der Leitlinienempfehlungen in die Tauchausbildung und über Zeitschriften.

### **6.2 Unterstützende Materialien für die Anwendung der Leitlinie**

Die Schlüsselempfehlungen der Leitlinie wurden mit schnell erfassbaren Flussdiagrammen dargestellt.

### **6.3 Diskussion möglicher organisatorischer und/oder finanzieller Barrieren gegenüber der Anwendung der Leitlinienempfehlungen**

Aufgrund einer bundesweit weiterhin geringen Zahl leistungsfähiger und uneingeschränkt einsatzbereiter Behandlungsdruckkammern, stellt die Organisation der Notfallversorgung eine erhebliche Schwierigkeit dar. Durch die fehlenden Behandlungsalternativen können keine abweichenden Therapieempfehlungen gegeben werden.

Diese ökonomisch und gesundheitspolitisch geprägten Schwierigkeiten in Deutschland müssen von den betroffenen Fachgesellschaften, hier der Gesellschaft für Tauch- und Überdruckmedizin (GTÜM) e.V. und der Deutschen Interdisziplinären Vereinigung für Intensiv- und Notfallmedizin (DIVI) e.V. Sektion Hyperbarmedizin zukünftig weiterhin diskutiert und verfolgt werden.

Von den Fachgesellschaften sollte die Etablierung eines bundesweiten Registers von HBO-Notfallbehandlungen angestrebt werden. Nur auf diesem Weg lassen sich eine Qualitätssicherung der hyperbarmedizinischen Versorgung und wissenschaftliche Beiträge zur Versorgungsforschung erreichen.

## **7. Gültigkeitsdauer und Aktualisierungsverfahren**

### **7.1 Datum der letzten inhaltlichen Überarbeitung**

Die S2k „Leitlinie Tauchunfall“ wurde zuletzt am 16.02.2015 überarbeitet.

### **7.2 Aktualisierungsverfahren**

Die S2k-Leitlinie ist bis zur nächsten Aktualisierung gültig, die Gültigkeitsdauer wird auf 3 Jahre geschätzt. Eine Überarbeitung der Leitlinie Tauchunfall ist spätestens bis zum 31.10.2017 vorgesehen.

Bei dringendem Änderungsbedarf werden diese gesondert publiziert. Kommentare und Hinweise für den Aktualisierungsprozess sind ausdrücklich erwünscht und können an die folgende Adresse gesendet werden:

Gesellschaft für Tauch- und Überdruckmedizin (GTÜM e.V.), Leitlinienbeauftragter,  
Professor-Küntscher-Straße 8, D-82418 Murnau am Staffelsee, [gtuem@gtuem.org](mailto:gtuem@gtuem.org).

## Anhang

**Gesellschaft für Tauch- und Überdruckmedizin (GTÜM e.V.)**  
**Leitlinie Tauchunfall 2014 – 2017**
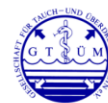

## Erklärungen über die Interessenkonflikte: Tabellarische Zusammenfassung

| Leitlinie Tauchunfall 2014 – 2017<br>Leitlinienkoordinator: Priv.-Doz. Dr. med. Björn Jüttner<br>AWMF-Registernummer: 072-001 |                                                                                                                                                                                                                                                                          |                                                                                       |                                           |                                                              |                                                              |
|-------------------------------------------------------------------------------------------------------------------------------|--------------------------------------------------------------------------------------------------------------------------------------------------------------------------------------------------------------------------------------------------------------------------|---------------------------------------------------------------------------------------|-------------------------------------------|--------------------------------------------------------------|--------------------------------------------------------------|
|                                                                                                                               |                                                                                                                                                                                                                                                                          | Dr. Björn Jüttner                                                                     | Dr. Christian Wölfel                      | Dr. Hendrik Liedtke                                          | Dr. Konrad Meyne                                             |
| 1                                                                                                                             | Berater- bzw. Gutachtertätigkeit oder bezahlte Mitarbeit in einem wissenschaftlichen Beirat eines Unternehmens der Gesundheitswirtschaft (z.B. Arzneimittelindustrie, Medizinproduktindustrie), eines kommerziell orientierten Auftragsinstituts oder einer Versicherung | nein                                                                                  | nein                                      | nein                                                         | nein                                                         |
| 2                                                                                                                             | Honorare für Vortrags- und Schulungstätigkeiten oder bezahlte Autoren- oder Co-Autorenschaften im Auftrag eines Unternehmens der Gesundheitswirtschaft, eines kommerziell orientierten Auftragsinstituts oder einer Versicherung                                         | Referent für tauch- und hyperbarmedizinische Weiterbildungen, Autor Fachzeitschriften | nein                                      | Referent für tauch- und hyperbarmedizinische Weiterbildungen | Referent für tauch- und hyperbarmedizinische Weiterbildungen |
| 3                                                                                                                             | Finanzielle Zuwendungen (Drittmittel) für Forschungsvorhaben oder direkte Finanzierung von Mitarbeitern der Einrichtung von Seiten eines Unternehmens der Gesundheitswirtschaft, eines kommerziell orientierten Auftragsinstituts oder einer Versicherung                | nein                                                                                  | nein                                      | nein                                                         | nein                                                         |
| 4                                                                                                                             | Eigentümerinteresse an Arzneimitteln/Medizinprodukten (z. B. Patent, Urheberrecht, Verkaufslizenz)                                                                                                                                                                       | nein                                                                                  | nein                                      | nein                                                         | nein                                                         |
| 5                                                                                                                             | Besitz von Geschäftsanteilen, Aktien, Fonds mit Beteiligung von Unternehmen der Gesundheitswirtschaft                                                                                                                                                                    | nein                                                                                  | nein                                      | Resortdoc GmbH                                               | nein                                                         |
| 6                                                                                                                             | Persönliche Beziehungen zu einem Vertretungsberechtigten eines Unternehmens Gesundheitswirtschaft                                                                                                                                                                        | nein                                                                                  | nein                                      | nein                                                         | nein                                                         |
| 7                                                                                                                             | Mitglied von in Zusammenhang mit der Leitlinienentwicklung relevanten Fachgesellschaften/Berufsverbänden, Mandatsträger im Rahmen der Leitlinienentwicklung                                                                                                              | GTÜM<br>EUBS<br>DGAI<br>DIVI<br>DAN Europe                                            | SUHMS<br>DAN Europe                       | GTÜM<br>DGAI<br>DIVI                                         | GTÜM<br>VDST                                                 |
| 8                                                                                                                             | Politische, akademische (z.B. Zugehörigkeit zu bestimmten „Schulen“), wissenschaftliche oder persönliche Interessen, die mögliche Konflikte begründen könnten                                                                                                            | nein                                                                                  | nein                                      | nein                                                         | nein                                                         |
| 9                                                                                                                             | Gegenwärtiger Arbeitgeber, relevante frühere Arbeitgeber der letzten 3 Jahre                                                                                                                                                                                             | MHH, Klinik für Anästhesie, Hannover                                                  | Spital Schwyz, Anästhesie, CH 6430 Schwyz | Krankenhaus St. Elisabeth, Klinik für Anästhesie, Halle      | Praxis für Gefäßmedizin, Goslar                              |

Eintrag: **nein** oder konkrete Angabe (falls ja)



**Gesellschaft für Tauch- und Überdruckmedizin (GTÜM e.V.)****Leitlinie Tauchunfall 2014 – 2017**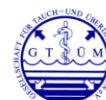

## Erklärungen über die Interessenkonflikte: Tabellarische Zusammenfassung

| Leitlinie Tauchunfall 2014 – 2017<br>Leitlinienkoordinator: Priv.-Doz. Dr. med. Björn Jüttner<br>AWMF-Registernummer: 072-001 |                                                                                                                                                                                                                                                                          |                                                  |                                                          |                                                               |                                                               |
|-------------------------------------------------------------------------------------------------------------------------------|--------------------------------------------------------------------------------------------------------------------------------------------------------------------------------------------------------------------------------------------------------------------------|--------------------------------------------------|----------------------------------------------------------|---------------------------------------------------------------|---------------------------------------------------------------|
|                                                                                                                               |                                                                                                                                                                                                                                                                          | Dr. Henning Werr                                 | Dr. Thomas Bräuer                                        | Michael Kemmerer                                              | Dr. Tim Piepho                                                |
| 1                                                                                                                             | Berater- bzw. Gutachtertätigkeit oder bezahlte Mitarbeit in einem wissenschaftlichen Beirat eines Unternehmens der Gesundheitswirtschaft (z.B. Arzneimittelindustrie, Medizinproduktindustrie), eines kommerziell orientierten Auftragsinstituts oder einer Versicherung | nein                                             | nein                                                     | nein                                                          | nein                                                          |
| 2                                                                                                                             | Honorare für Vortrags- und Schulungstätigkeiten oder bezahlte Autoren- oder Co-Autorenschaften im Auftrag eines Unternehmens der Gesundheitswirtschaft, eines kommerziell orientierten Auftragsinstituts oder einer Versicherung                                         | nein                                             | nein                                                     | Referent für tauch- und hyperbar-medizinische Weiterbildungen | Referent für tauch- und hyperbar-medizinische Weiterbildungen |
| 3                                                                                                                             | Finanzielle Zuwendungen (Drittmittel) für Forschungsvorhaben oder direkte Finanzierung von Mitarbeitern der Einrichtung von Seiten eines Unternehmens der Gesundheitswirtschaft, eines kommerziell orientierten Auftragsinstituts oder einer Versicherung                | nein                                             | nein                                                     | nein                                                          | nein                                                          |
| 4                                                                                                                             | Eigentümerinteresse an Arzneimitteln/Medizinprodukten (z. B. Patent, Urheberrecht, Verkaufslizenz)                                                                                                                                                                       | nein                                             | nein                                                     | nein                                                          | nein                                                          |
| 5                                                                                                                             | Besitz von Geschäftsanteilen, Aktien, Fonds mit Beteiligung von Unternehmen der Gesundheitswirtschaft                                                                                                                                                                    | nein                                             | nein                                                     | Druckkammerzentren RMT GmbH                                   | nein                                                          |
| 6                                                                                                                             | Persönliche Beziehungen zu einem Vertretungsberechtigten eines Unternehmens Gesundheitswirtschaft                                                                                                                                                                        | nein                                             | nein                                                     | Druckkammerzentren RMT GmbH                                   | nein                                                          |
| 7                                                                                                                             | Mitglied von in Zusammenhang mit der Leitlinienentwicklung relevanten Fachgesellschaften/Berufsverbänden, Mandatsträger im Rahmen der Leitlinienentwicklung                                                                                                              | GTÜM<br>DGAI                                     | BG Bau ist Arbeitgeber                                   | VDD                                                           | GTÜM<br>DGAI                                                  |
| 8                                                                                                                             | Politische, akademische (z.B. Zugehörigkeit zu bestimmten „Schulen“), wissenschaftliche oder persönliche Interessen, die mögliche Konflikte begründen könnten                                                                                                            | nein                                             | nein                                                     | nein                                                          | nein                                                          |
| 9                                                                                                                             | Gegenwärtiger Arbeitgeber, relevante frühere Arbeitgeber der letzten 3 Jahre                                                                                                                                                                                             | Bundeswehr,<br>Zentrum Sanitätsdienst,<br>Marine | Arbeitsmedizinisch-/Sicherheits-technische Dienst BG Bau | Druckkammerzentren RMT GmbH,<br>Wiesbaden                     | Universität Mainz<br>Klinik für Anästhesie,<br>Mainz          |

Eintrag: **nein** oder konkrete Angabe (falls ja)

**Gesellschaft für Tauch- und Überdruckmedizin (GTÜM e.V.)****Leitlinie Tauchunfall 2014 – 2017**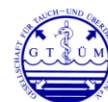

## Erklärungen über die Interessenkonflikte: Tabellarische Zusammenfassung

| Leitlinie Tauchunfall 2014 – 2017<br>Leitlinienkoordinator: Priv.-Doz. Dr. med. Björn Jüttner<br>AWMF-Registernummer: 072-001 |                                                                                                                                                                                                                                                                          |                                                                 |                                                               |                                         |  |
|-------------------------------------------------------------------------------------------------------------------------------|--------------------------------------------------------------------------------------------------------------------------------------------------------------------------------------------------------------------------------------------------------------------------|-----------------------------------------------------------------|---------------------------------------------------------------|-----------------------------------------|--|
|                                                                                                                               |                                                                                                                                                                                                                                                                          | Dr. Oliver Müller                                               | Dr. Holger Schöppenthau                                       | Dr. Giso Schmeißer                      |  |
| 1                                                                                                                             | Berater- bzw. Gutachtertätigkeit oder bezahlte Mitarbeit in einem wissenschaftlichen Beirat eines Unternehmens der Gesundheitswirtschaft (z.B. Arzneimittelindustrie, Medizinproduktindustrie), eines kommerziell orientierten Auftragsinstituts oder einer Versicherung | nein                                                            | nein                                                          | nein                                    |  |
| 2                                                                                                                             | Honorare für Vortrags- und Schulungstätigkeiten oder bezahlte Autoren- oder Co-Autorenschaften im Auftrag eines Unternehmens der Gesundheitswirtschaft, eines kommerziell orientierten Auftragsinstituts oder einer Versicherung                                         | Referent für tauch- und hyperbar-medizinische Weiterbildungen   | Referent für tauch- und hyperbar-medizinische Weiterbildungen | nein                                    |  |
| 3                                                                                                                             | Finanzielle Zuwendungen (Drittmittel) für Forschungsvorhaben oder direkte Finanzierung von Mitarbeitern der Einrichtung von Seiten eines Unternehmens der Gesundheitswirtschaft, eines kommerziell orientierten Auftragsinstituts oder einer Versicherung                | nein                                                            | nein                                                          | nein                                    |  |
| 4                                                                                                                             | Eigentümerinteresse an Arzneimitteln/Medizinprodukten (z. B. Patent, Urheberrecht, Verkaufslizenz)                                                                                                                                                                       | nein                                                            | nein                                                          | nein                                    |  |
| 5                                                                                                                             | Besitz von Geschäftsanteilen, Aktien, Fonds mit Beteiligung von Unternehmen der Gesundheitswirtschaft                                                                                                                                                                    | nein                                                            | nein                                                          | nein                                    |  |
| 6                                                                                                                             | Persönliche Beziehungen zu einem Vertretungsberechtigten eines Unternehmens Gesundheitswirtschaft                                                                                                                                                                        | Arzt in einer klinik-betriebenen Druckkammer                    | Arzt in einer klinik-betriebenen Druckkammer                  | nein                                    |  |
| 7                                                                                                                             | Mitglied von in Zusammenhang mit der Leitlinienentwicklung relevanten Fachgesellschaften/Berufsverbänden, Mandatsträger im Rahmen der Leitlinienentwicklung                                                                                                              | GTÜM<br>DGAI<br>DIVI                                            | GTÜM<br>DIVI                                                  | DGAUM<br>VDBW                           |  |
| 8                                                                                                                             | Politische, akademische (z.B. Zugehörigkeit zu bestimmten „Schulen“), wissenschaftliche oder persönliche Interessen, die mögliche Konflikte begründen könnten                                                                                                            | nein                                                            | nein                                                          | DGUV ist Arbeitgeber                    |  |
| 9                                                                                                                             | Gegenwärtiger Arbeitgeber, relevante frühere Arbeitgeber der letzten 3 Jahre                                                                                                                                                                                             | Vivantes Klinikum Friedrichshain, Klinik für Anästhesie, Berlin | BGU, Druckkammer zentrum, Murnau                              | Deutsche gesetzliche Unfallversicherung |  |

Eintrag: **nein** oder konkrete Angabe (falls ja)
